# Supplementary material
Source: publisher figshare collection journal article supplement (https://karger.figshare.com/ndownloader/files/23101223)
Supplement: Supplementary file 1 [file 23101223]

Supplementary Material 1

Informationsblatt

Für die Prüfung des M.Sc. Moduls B

Klinische Psychologie und Psychotherapie

Mündliche Prüfung (25 min.)

Prüfungszeitraum: 10.02.-14.02.2020

Erst-Prüfende:   Prof. Dr. Eva-Lotta Brakemeier

Dr. Tim Kaiser

Dr. Jan Richter

Basis-Seminare und Methoden: - Unified Protocol (Kaiser): KVT

- Moderne Ansätze der Psychotherapie in der Praxis
  (Brakemeier): CBASP, DBT, MBT, Schematherapie
- Zwangsstörungen (Herzog)
- VT-Fallseminar (Richter): KVT

**Prüfungsformen**

Die Studierenden können zwischen zwei Prüfungsformen der Mündlichen Prüfung wählen.

1. Klassische Prüfung zum psychotherapeutischen Fakten- und Handlungswissen sowie vertiefenden Fragen zur Psychotherapie

Diese Prüfung besteht aus zwei Teilen

- - Mündlich-praktische Fallprüfung über einen von dem Studierenden eingebrachten Fall oder typische Fallbeispiele aus den besuchten Seminaren (10 Minuten)
  - Daran anknüpfende fallübergreifende, vertiefende Fragen zur Psychotherapie, welche in den besuchten Seminaren (mind. zwei) behandelt wurden (vgl. auch bisherige Prüfung durch Prof. Dr. Alfons Hamm) (15 Minuten)

1. Neue Prüfungsform zum psychotherapeutischen Fakten- und Handlungswissen sowie anwendungsorientierter Parcoursprüfung

Diese Prüfung besteht ebenfalls aus zwei Teilen (nähere Erläuterungen s.u.):

- - Mündlich-praktische Fallprüfung, identisch zum ersten Teil von 1 (s.o.)
    (10 Minuten)
  - Anwendungsorientierte Parcoursprüfung, die sich auf ein bis zwei Kompetenzbereiche bezieht (15 Minuten)

**Erläuterungen**

Bei beiden Prüfungsformaten ist der erste Teil identisch. Sie unterscheiden sich lediglich im zweiten Teil. Im Folgenden werden die Prüfungsteile jeweils näher beschrieben.

Teil 1 in beiden Varianten

Während dieses Prüfungsteils hat die zu prüfende Person fallspezifische Fragen zu der/dem als Prüfungsfall ausgewählten Patient*in oder typischen Fallbeispielen aus den Seminaren zu beantworten (vgl. auch bisherige Prüfung durch Prof. Dr. Alfons Hamm).

Teil 2 in der Variante 1

Anknüpfend an Teil 1 werden im zweiten Teil fallübergreifende und vertiefende Fragen zur Psychotherapie gestellt, welche in den besuchten Seminaren (mind. zwei) behandelt wurden. Es wird Fakten- und Handlungswissen anhand der in den Seminare behandelten typischen Störungsbilder abgefragt (vgl. auch bisherige Prüfung durch Prof. Dr. Alfons Hamm).

Teil 2 in der Variante 2

Die anwendungsorientierte Parcoursprüfung wird mit Hilfe von Simulationspatient*innen durchgeführt, die zuvor für die Prüfung geschult worden sind. Sie spielen jeweils Patient*innen, welche die typische, in den Seminaren behandelte Symptomatik aufweisen. Im Folgenden finden sich 9 Kompetenzbereiche, in denen die Prüfung erfolgen kann. Ihre Auswahl beruht auf den Kompetenzbereichen, welche in den vier Basis-Seminaren vorgestellt und geübt wurden.

Die oder der Studierende kann vor der Prüfung der/dem 1. Prüfer*in drei Kompetenzbereiche angeben, welche mindestens 2 der vier Seminare abdecken sollten. Von diesen drei Kompetenzbereichen werden 1-2 während der Prüfung ausgewählt.

- Kompetenzbereich 1: Vermittlung des Störungsmodells und Ableitung des Therapierationals (insb. Exposition) (Seminar Zwangsstörungen)
- Kompetenzbereich 2*: Nicht-bewertende, gegenwartsbezogene Aufmerksamkeit (Achtsamkeit bei emotionalen Erfahrungen, UP Modul 3 bzw. erster *Core Skill*)
- Kompetenzbereich 3*: Kognitive Bewertung und Umbewertung (UP Modul 4, zweiter *Core Skill*)
- Kompetenzbereich 4*: problematische Handlungstendenzen erkennen und verändern (UP Modul 5 bzw. dritter *Core Skill* im Unified Protocol)
- Kompetenzbereich 5*: Bewusstsein für und Toleranz gegenüber körperlichen Empfindungen durch interozeptive Expositionsübungen (Modul 6 bzw. vierter *Core Skill* im Unified Protocol)
- Kompetenzbereich 6: Konfrontation und Exposition (*in sensu* und *in vivo,* UP Modul 7, Seminar Zwangsstörungen)
- Kompetenzbereich 7**: Umgang mit schwierigen interpersonellen Situationen während der Sitzung durch die Anwendung von CBASP Strategien (Seminar Moderne Ansätze)
- Kompetenzbereich 8:** Umgang mit schwierigen interpersonellen Situationen während der Sitzung durch die Anwendung von DBT Strategien (Seminar Moderne Ansätze)
- Kompetenzbereich 9**: Umgang mit schwierigen interpersonellen Situationen während der Sitzung durch die Anwendung von Strategien der Schematherapie (Seminar Moderne Ansätze)

*Zur Durchführung der Kompetenzbereiche 2 bis 5 stehen in der Prüfung die entsprechenden Arbeitsblätter zur Verfügung.

**Bei den Kompetenzbereichen 7 bis 9 können folgende vier schwierige interpersonelle Situationen basierend auf den Patienten-Beispielen, welche im Seminar behandelt wurden (vgl. auch DVD: Schwierige Situationen in der modernen Psychotherapie), in der Prüfung vorkommen. Die oder der Studierende können bis zum 27.01.2020 zwei Situationen auswählen kann, von denen eine dargestellt wird:

- Der wütende Patient basierend auf „Leo Kroll“
- Der verschlossene Patient basierend auf „Lasse Sander“
- Der suizidale Patient basierend auf „Peter Brauer“
- Der verliebte Patient basierend auf „Fritz Wohlfahrt“

Vorbereitung

**Es wird gebeten, der/dem 1. Prüfer*in bis spätestens dem 27.01.2020 folgende Angaben per mail zu schicken:**

- Wahl der Prüfungsarten (Variante 1 oder Variante 2)
- Mitteilung, welche Seminare prüfungsrelevant sein sollen (mind. 2 der 4 Seminare)
- Wenn Variante 2 gewählt wird, sollten zudem von den 9 Kompetenzbereichen 3 ausgewählt werden (aus mind. 2 verschiedenen Seminaren), wovon dann 1-2 geprüft werden. Wird einer oder mehrere der Kompetenzbereiche 7 bis 9 gewählt, sollten zudem noch pro Kompetenzbereich zwei Patientenbeispiele/Situationen ausgewählt werden.

Sollten weitere Frage auftauchen, senden Sie bitte Frau Prof. Brakemeier oder Herrn Dr. Kaiser eine mail. Wir wünschen Ihnen eine gute und spannende Vorbereitung und freuen uns auf die Prüfungen!
